# Supplementary material
Source: PubMed Central journal article supplement (PMC5518937)
Supplement: NIHMS876504-supplement-Supplementary.pdf [file NIHMS876504-supplement-Supplementary.pdf]

## Expression of p63 protein in anaplastic large cell lymphoma: implications for genetic subtyping

Xueju Wang MD, PhD, Rebecca L. Boddicker PhD, Surendra Dasari PhD, Jagmohan S. Sidhu MD, Marshall E. Kadin MD, William R. Macon MD, Stephen M. Ansell, MD, PhD, Rhett P. Ketterling MD, Karen L. Rech MD and Andrew L. Feldman MD

### Supplemental Materials

**Supplemental Table 1** Correlation between copy numbers of *TP63* and *DUSP22* loci in ALCL (all WHO subtypes)

|                                    | <i>DUSP22</i> genetic status – n (%)       |                   |                     | <u>Total</u> |
|------------------------------------|--------------------------------------------|-------------------|---------------------|--------------|
|                                    | <u>Non-rearranged,<br/>no extra copies</u> | <u>Rearranged</u> | <u>Extra copies</u> |              |
| <u><i>TP63</i> genetic status</u>  |                                            |                   |                     |              |
| Non-rearranged,<br>no extra copies | 45 (58.4)                                  | 27 (35.1)         | 5 (6.5)             | 77           |
| Rearranged                         | 7 (70.0)                                   | 1 (10.0)          | 2 (20.0)            | 10           |
| Extra copies                       | 8 (29.6)                                   | 4 (14.8)          | 15 (55.6)           | 27           |
| Total                              | 60                                         | 32                | 22                  | 114*         |

p<0.0001, Pearson  $\chi^2$  test.

\*Two ALCLs on which *DUSP22* FISH was not performed were excluded.

**Supplemental Table 2** ALCLs tested for  $\Delta$ Np63 expression by immunohistochemistry\*

|                                                     | WHO subtype         |                     |                          | <u>Total</u> |
|-----------------------------------------------------|---------------------|---------------------|--------------------------|--------------|
|                                                     | <u>ALK-positive</u> | <u>ALK-negative</u> | <u>Primary cutaneous</u> |              |
| <i>TP63</i> rearranged,<br>p63 protein-positive     | 0                   | 4                   | 2                        | 6            |
| <i>TP63</i> non-rearranged,<br>p63 protein-positive | 0                   | 12                  | 3                        | 15           |
| <i>TP63</i> non-rearranged,<br>p63 protein-negative | 15                  | 17                  | 6                        | 38           |

\*No positive staining was seen in any case.

Abbreviations: ALCL: anaplastic large cell lymphoma; ALK: anaplastic lymphoma kinase; WHO: World Health Organization.

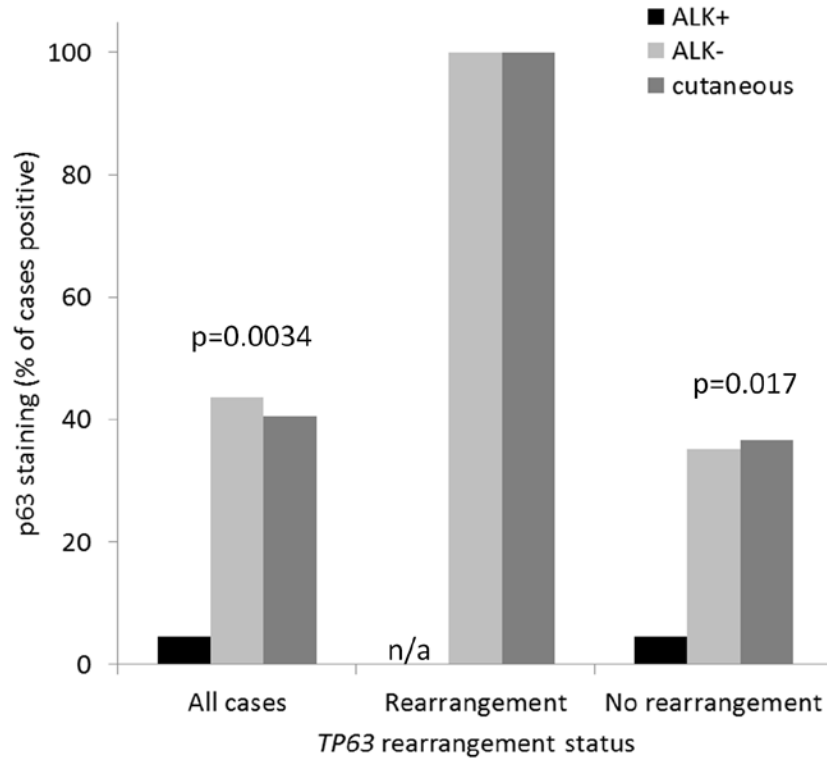

**Supplemental Figure 1** Proportions of ALCLs positive for p63 by IHC (defined as positive staining in  $\geq 30\%$  of tumor cell nuclei), stratified by WHO subtype and *TP63* rearrangement status. n/a, not applicable (*TP63* rearrangements were not observed in ALK-positive ALCLs).

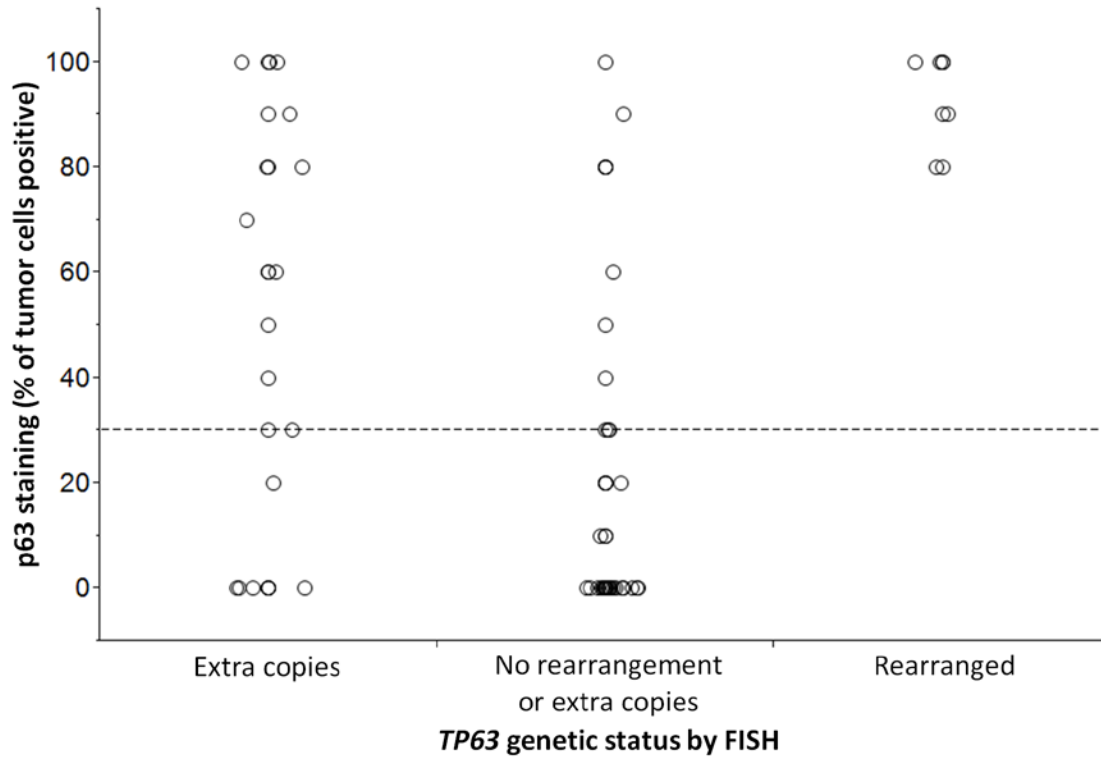

**Supplemental Figure 2** Distribution of anaplastic large cell lymphomas (ALCLs) in the present study based on *TP63* genetic status by fluorescence *in situ* hybridization (FISH) and p63 immunohistochemistry results. All cases with *TP63* rearrangements showed strong nuclear staining in  $\geq 80\%$  of tumor cells. Although intensity of staining may be informative [1], it is difficult to assess reproducibly in clinical practice and may be affected by technical factors such as fixation. We propose performing FISH in cases with nuclear staining in  $\geq 30\%$  of tumor cells (dashed line), regardless of staining intensity. This cut-off has a sensitivity of 100% and a specificity of 71%. Although higher cut-off values also would have 100% sensitivity in this study, the more conservative value of 30% might identify additional positive cases with increasing experience, and could avoid the need for FISH in up to 65% of cases, depending on the patient population and practice algorithm adopted (see Supplemental Figure 3, below).

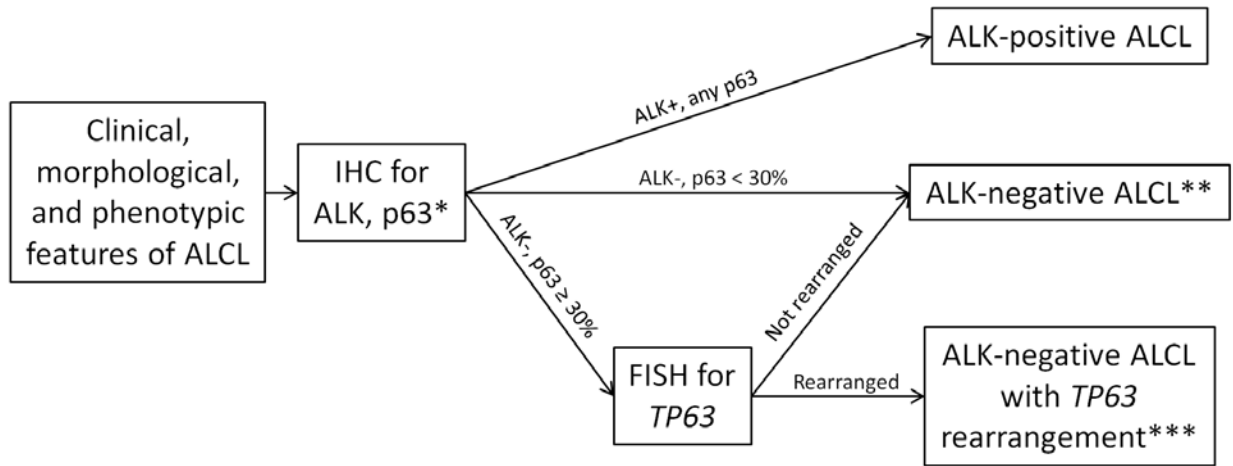

**Supplemental Figure 3** Possible algorithm for use of p63 immunohistochemistry (IHC) and *TP63* fluorescence *in situ* hybridization (FISH) in the evaluation of anaplastic large cell lymphoma (ALCL).

\**TP63* rearrangements have not been reported in ALK-positive ALCL; therefore, IHC for ALK and p63 could be sequential instead of concurrent, reserving p63 evaluation only for ALK-negative cases. However, cost savings would need to be weighed against increased turnaround time.

\*\*FISH testing for *DUSP22* rearrangements should be considered in ALK-negative ALCL [1, 2].

\*\*\*ALK-negative ALCL with *TP63* rearrangement is not a distinct entity in the World Health Organization classification system; the diagnosis is ALK-negative ALCL and the rearrangement should be mentioned because of its potential prognostic significance [1, 2].

### **Supplemental References**

1. Parrilla Castellar ER, Jaffe ES, Said JW, et al. ALK-negative anaplastic large cell lymphoma is a genetically heterogeneous disease with widely disparate clinical outcomes. *Blood* 2014;124:1473-80.
2. Swerdlow SH, Campo E, Pileri SA, et al. The 2016 revision of the World Health Organization classification of lymphoid neoplasms. *Blood* 2016;127:2375-90.
